# Supplementary material
Source: PubMed Central journal article supplement (PMC6874885)
Supplement: NIHMS1024221-supplement-supplemental_data.pdf [file NIHMS1024221-supplement-supplemental_data.pdf]

## Supplementary Materials: Propensity Score Analysis for VAP/VAPBACT and Mortality

Goal: Estimate effect of VAP + Bacteremia over VAP alone on hospital mortality in absence of randomization. Adjust for potential bias due to confounding using propensity score analysis.

Relevant covariates include:

- Age Gender
- Race (coded as white/non-white)
- Initial base deficit ( $\geq 6$  vs.  $< 6$ )
- Blood transfused in first 24 hours
- APS
- Pulmonary contusion
- Injury severity score (ISS)
- Body region abbreviated injury scale scores (AIS)
- Mechanism of injury (blunt vs. other)
- Co-morbidities

Covariate list

AGECAT: age categorized in empiric quartiles (0-25, 25-40, 40-55,  $>55$ )

GENDERM: Sex (male =1)

WHITE: white vs. non-white with unknown race coded as white

FIRSTBDE6 - initial base deficit coded  $\geq 6$ meq/l (yes = 1) or  $\leq$   
(Assuming normal if not measured)

BLOODCAT: blood transfusions in the first 24 hours categorized in quartiles (0, 1-5, 6-15,  $>15$ ), but used as a continuous variable)

APSQ: APS coded in empiric quartiles (but used as a continuous variable)

ISSQ: ISS as a continuous variable or coded in empiric quartiles (but used as a continuous variable)

Co-morbidities with adequate data (cardiovascular, diabetes, respiratory disease)

AISHEAD, AISABD, AISCHEST, AISSPINE, AISUE, AISLE—body region injuries coded as less severe (0-2) or more severe ( $\geq 3$ )

PULCONT—pulmonary contusion

Hospital Mortality (Raw)

| Outcome                 | VAP   | VAP +<br>Bacteremia |
|-------------------------|-------|---------------------|
| Survived                | 424   | 55                  |
| Died                    | 56    | 19                  |
| Hospital mortality rate | 11.7% | 25.7%               |

The unadjusted relative risk of death associated with VAP + Bacteremia is 2.20.

The odds ratio is 2.62 with a 95% confidence interval (1.45, 4.72).

The absolute increase in mortality rate associated with VAP + Bacteremia is 14.0% with a 95% confidence interval (2.9%, 25.1%).

## Propensity Score

### Compute propensity scores to balance prognostic variables across VAP and VAP + Bacteremia groups

Deviance Residuals:

| Min     | 1Q      | Median  | 3Q      | Max    |
|---------|---------|---------|---------|--------|
| -0.9940 | -0.5660 | -0.4600 | -0.3562 | 2.5623 |

Coefficients:

|                | Estimate | Std. Error | z value | Pr(> z ) |
|----------------|----------|------------|---------|----------|
| (Intercept)    | -2.84657 | 1.12584    | -2.528  | 0.0115 * |
| AGECAT         | 0.13205  | 0.14351    | 0.920   | 0.3575   |
| GENDERM        | 0.28460  | 0.32949    | 0.864   | 0.3877   |
| WHITE          | 0.46566  | 0.39630    | 1.175   | 0.2400   |
| FIRSTBDE6YES   | 0.26180  | 0.30744    | 0.852   | 0.3944   |
| BLOODCAT       | 0.03428  | 0.15000    | 0.229   | 0.8192   |
| APSQ           | 0.22265  | 0.14641    | 1.521   | 0.1283   |
| ISSQ           | -0.14536 | 0.17131    | -0.849  | 0.3961   |
| CISCVYES       | 0.32713  | 0.33028    | 0.990   | 0.3219   |
| CISDIABETESYES | 0.56547  | 0.45966    | 1.230   | 0.2186   |
| CISLUNGYES     | -0.12162 | 0.42445    | -0.287  | 0.7745   |
| AISHEADLOW     | -0.04076 | 0.32762    | -0.124  | 0.9010   |
| AISABDLOW      | -0.08271 | 0.35120    | -0.235  | 0.8138   |
| AISCHESTLOW    | -0.35120 | 0.37077    | -0.947  | 0.3435   |
| AISSPINELOW    | -0.51276 | 0.28627    | -1.791  | 0.0733 . |
| AISUELOW       | 0.02928  | 0.39990    | 0.073   | 0.9416   |
| AISLELOW       | -0.05369 | 0.29951    | -0.179  | 0.8577   |
| PULCONTYES     | -0.09314 | 0.34270    | -0.272  | 0.7858   |

---

Signif. codes: 0 '\*\*\*' 0.001 '\*\*' 0.01 '\*' 0.05 '.' 0.1 ' ' 1

(Dispersion parameter for binomial family taken to be 1)

Null deviance: 384.14 on 491 degrees of freedom  
Residual deviance: 363.76 on 474 degrees of freedom  
AIC: 399.76

Number of Fisher Scoring iterations: 5

```
> summary(pscore$ps2)
  Min. 1st Qu.  Median    Mean 3rd Qu.    Max.
0.02994 0.07973 0.11690 0.13250 0.16270 0.48780
```

### Assessment of the effect of the propensity score model in adjusting for the risk for bacteremia

Model propensity scores range from .03 to .49.

Compare the distribution of scores in the 2 groups:

As expected, the propensity scores are on average slightly higher in the VAP + Bacteremia group with a good degree of overlap.

Check the distribution of explanatory variables by plotting the median and IQR of continuous variables in each propensity score quartile. Compare t-statistics before and after adjusting for the propensity score. Examine distribution of categorical covariates in propensity score quartiles. Run stratified logistic models to check balance for categorical variables.

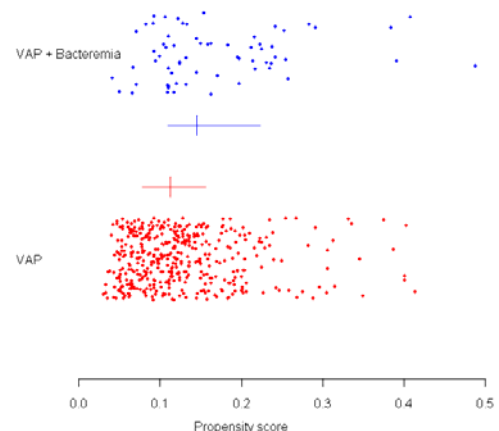

Continuous  
 AGECAT, BLOODCAT, APSQ, ISSQ

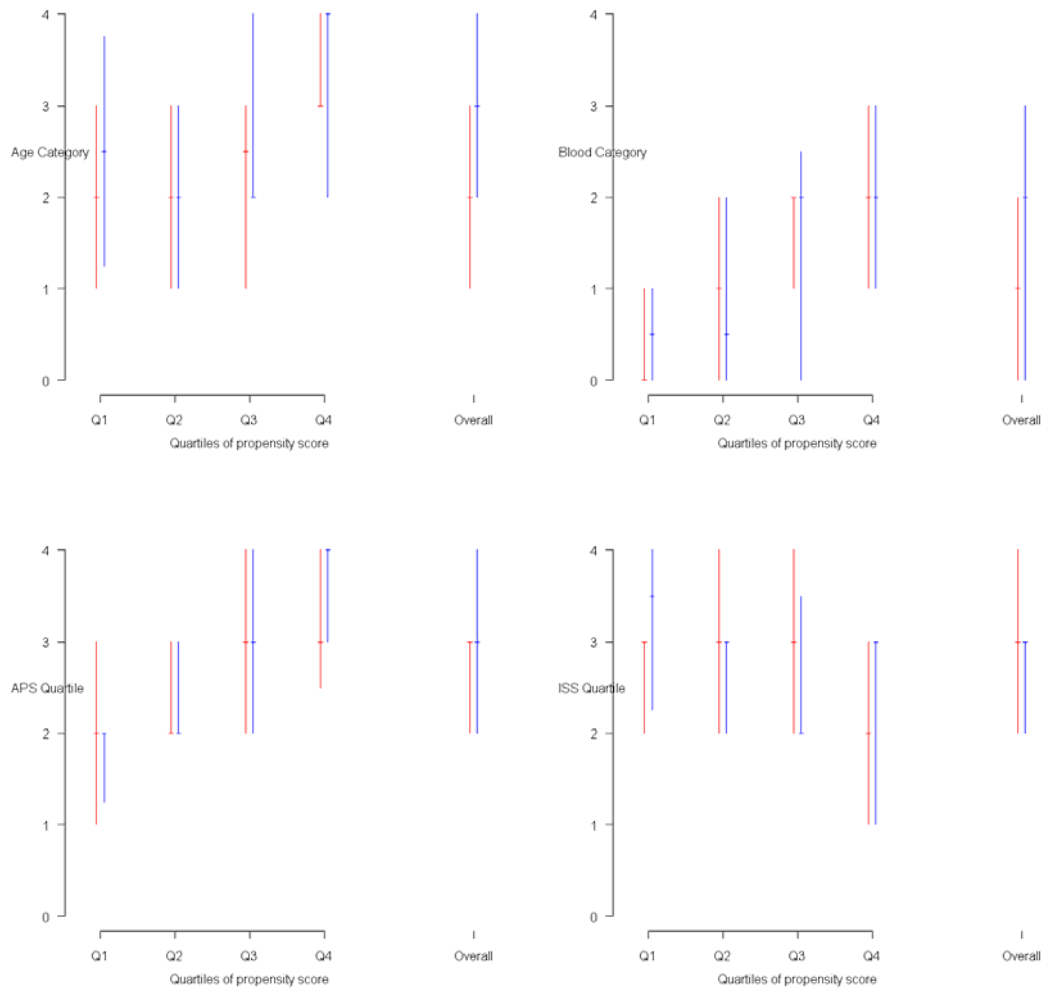

Before and after propensity score t-statistics:

|             | Before     | After       | p-Value After* |
|-------------|------------|-------------|----------------|
| AGE         | 2.1514208  | 0.79975446  | .42            |
| Blood Units | 1.6797357  | 0.28498955  | .78            |
| APS         | 1.7517384  | 0.42125266  | .67            |
| ISS         | -0.4974791 | -0.07058082 | .94            |

Categorical data

GENDER, WHITE, FIRSTBDE6, CISCV, CISDIABETES, CISLUNG, AISHEAD, AISABD, AISCHEST, AISSPINE, AISUE, AISLE, PULCONT

Gender

|               | VAP      |          | VAP + Bacteremia |         |
|---------------|----------|----------|------------------|---------|
|               | Male     | Female   | Male             | Female  |
| Q1            | 79 (68%) | 38 (32%) | 5 (83%)          | 1 (17%) |
| Q2            | 73 (68%) | 34 (32%) | 12 (75%)         | 4 (25%) |
| Q3            | 86 (80%) | 22 (20%) | 11 (73%)         | 4 (27%) |
| Q4            | 76 (80%) | 19 (20%) | 22 (79%)         | 6 (21%) |
| p-Value = .83 |          |          |                  |         |

White

|               | VAP      |           | VAP + Bacteremia |           |
|---------------|----------|-----------|------------------|-----------|
|               | White    | Non-White | White            | Non-White |
| Q1            | 65 (56%) | 52(44%)   | 3 (50%)          | 3 (50%)   |
| Q2            | 85 (79%) | 22 (21%)  | 16 (100%)        | 0 (0%)    |
| Q3            | 96 (89%) | 12 (11%)  | 11 (73%)         | 4 (27%)   |
| Q4            | 88 (93%) | 7 (7%)    | 26 (93%)         | 2 (7%)    |
| p-Value = .83 |          |           |                  |           |

Initial Base Deficit

|               | VAP      |           | VAP + Bacteremia |         |
|---------------|----------|-----------|------------------|---------|
|               | High     | Low       | High             | Low     |
| Q1            | 17 (15%) | 100 (85%) | 2 (33%)          | 4 (67%) |
| Q2            | 42 (39%) | 65 (61%)  | 9 (56%)          | 7 (44%) |
| Q3            | 63 (58%) | 45 (42%)  | 7 (47%)          | 8 (53%) |
| Q4            | 70 (74%) | 25 (26%)  | 19 (68%)         | 9 (32%) |
| p-Value = .85 |          |           |                  |         |

Cardiovascular Comorbidity

|               | VAP      |          | VAP + Bacteremia |          |
|---------------|----------|----------|------------------|----------|
|               | Yes      | No       | Yes              | No       |
| Q1            | 5 (4%)   | 112(96%) | 1 (17%)          | 5 (83%)  |
| Q2            | 23 (21%) | 84 (79%) | 2 (13%)          | 14 (87%) |
| Q3            | 31 (29%) | 77 (71%) | 5 (33%)          | 10 (67%) |
| Q4            | 60 (63%) | 35 (37%) | 19 (68%)         | 9 (32%)  |
| p-Value = .74 |          |          |                  |          |

Diabetes Comorbidity

|               | VAP      |           | VAP + Bacteremia |           |
|---------------|----------|-----------|------------------|-----------|
|               | Yes      | No        | Yes              | No        |
| Q1            | 0 (0%)   | 117(100%) | 0 (0%)           | 6 (100%)  |
| Q2            | 3 (3%)   | 104 (97%) | 0 (0%)           | 16 (100%) |
| Q3            | 2 (2%)   | 106 (98%) | 1 (7%)           | 14 (93%)  |
| Q4            | 22 (23%) | 73 (77%)  | 8 (29%)          | 20 (71%)  |
| p-Value = .51 |          |           |                  |           |

Respiratory Comorbidity

|    | VAP      |          | VAP + Bacteremia |         |
|----|----------|----------|------------------|---------|
|    | Yes      | No       | Yes              | No      |
| Q1 | 13 (11%) | 104(89%) | 1 (17%)          | 5 (83%) |

|               |          |           |         |          |
|---------------|----------|-----------|---------|----------|
| Q2            | 15 (14%) | 92 (86%)  | 3 (19%) | 13 (81%) |
| Q3            | 8 (7%)   | 100 (93%) | 1 (7%)  | 14 (93%) |
| Q4            | 18 (19%) | 77 (81%)  | 3 (11%) | 25 (89%) |
| p-Value = .72 |          |           |         |          |

#### AIS Head

|               | VAP      |          | VAP + Bacteremia |          |
|---------------|----------|----------|------------------|----------|
|               | High     | Low      | High             | Low      |
| Q1            | 86 (73%) | 31 (27%) | 4 (67%)          | 2 (33%)  |
| Q2            | 75 (70%) | 32 (30%) | 12 (75%)         | 4 (25%)  |
| Q3            | 59 (55%) | 49 (45%) | 7 (47%)          | 8 (53%)  |
| Q4            | 50 (53%) | 45 (47%) | 13 (46%)         | 15 (54%) |
| p-Value = .56 |          |          |                  |          |

#### AIS Abdomen

|               | VAP      |          | VAP + Bacteremia |          |
|---------------|----------|----------|------------------|----------|
|               | High     | Low      | High             | Low      |
| Q1            | 31 (27%) | 86 (73%) | 3 (50%)          | 3 (50%)  |
| Q2            | 28 (26%) | 79 (74%) | 6 (37%)          | 10 (63%) |
| Q3            | 42 (39%) | 66 (61%) | 4 (27%)          | 11 (73%) |
| Q4            | 37 (39%) | 58 (61%) | 10 (36%)         | 18 (64%) |
| p-Value = .86 |          |          |                  |          |

#### AIS Chest

|               | VAP      |          | VAP + Bacteremia |         |
|---------------|----------|----------|------------------|---------|
|               | High     | Low      | High             | Low     |
| Q1            | 46 (39%) | 71 (61%) | 3 (50%)          | 3 (50%) |
| Q2            | 67 (63%) | 40 (37%) | 8 (50%)          | 8 (50%) |
| Q3            | 76 (70%) | 32 (30%) | 11 (73%)         | 4 (27%) |
| Q4            | 74 (78%) | 21 (22%) | 22 (79%)         | 6 (21%) |
| p-Value = .86 |          |          |                  |         |

#### AIS Spine

|               | VAP      |          | VAP + Bacteremia |          |
|---------------|----------|----------|------------------|----------|
|               | High     | Low      | High             | Low      |
| Q1            | 23 (20%) | 94 (80%) | 1 (17%)          | 5 (83%)  |
| Q2            | 31 (29%) | 76 (71%) | 4 (25%)          | 12 (75%) |
| Q3            | 40 (37%) | 68 (63%) | 7 (47%)          | 8 (53%)  |
| Q4            | 57 (60%) | 38 (40%) | 18 (64%)         | 10 (36%) |
| p-Value = .67 |          |          |                  |          |

#### AIS UE

|               | VAP      |           | VAP + Bacteremia |          |
|---------------|----------|-----------|------------------|----------|
|               | High     | Low       | High             | Low      |
| Q1            | 8 (7%)   | 109 (93%) | 3 (50%)          | 3 (50%)  |
| Q2            | 21 (20%) | 86 (80%)  | 1 (6%)           | 15 (94%) |
| Q3            | 16 (15%) | 92 (85%)  | 3 (20%)          | 12 (80%) |
| Q4            | 13 (14%) | 82 (86%)  | 3 (11%)          | 25 (89%) |
| p-Value = .80 |          |           |                  |          |

#### AIS LE

|  | VAP  |     | VAP + Bacteremia |     |
|--|------|-----|------------------|-----|
|  | High | Low | High             | Low |

|               |          |          |          |          |
|---------------|----------|----------|----------|----------|
| Q1            | 29 (25%) | 88 (75%) | 3 (50%)  | 3 (50%)  |
| Q2            | 41 (38%) | 66 (62%) | 5 (31%)  | 11 (69%) |
| Q3            | 49 (45%) | 59 (55%) | 7 (47%)  | 8 (53%)  |
| Q4            | 55 (58%) | 40 (42%) | 16 (57%) | 12 (43%) |
| p-Value = .90 |          |          |          |          |

### Pulmonary Contusion

|               | VAP      |          | VAP + Bacteremia |          |
|---------------|----------|----------|------------------|----------|
|               | Yes      | No       | Yes              | No       |
| Q1            | 31 (26%) | 86 (74%) | 1 (17%)          | 5 (83%)  |
| Q2            | 41 (38%) | 66 (62%) | 5 (31%)          | 11 (69%) |
| Q3            | 41 (38%) | 67 (62%) | 6 (40%)          | 9 (60%)  |
| Q4            | 33 (35%) | 62 (65%) | 10 (36%)         | 18 (64%) |
| p-Value = .76 |          |          |                  |          |

After adjusting for propensity score, there were no differences in the risk factors between patients with and without bacteremia. This indicates that the propensity score captures the risk for bacteremia associated with each of the variables included in the model.

### ***Determine the risk for mortality associated with bacteremia after adjusting for propensity score quartile***

1. Determine mortality rates within propensity score quartiles. Plot hospital mortality rates (with 95% confidence intervals) by VAP/VAP + Bacteremia in each propensity score quartile: (VAP [red], VAP + Bacteremia [blue] in figure below)

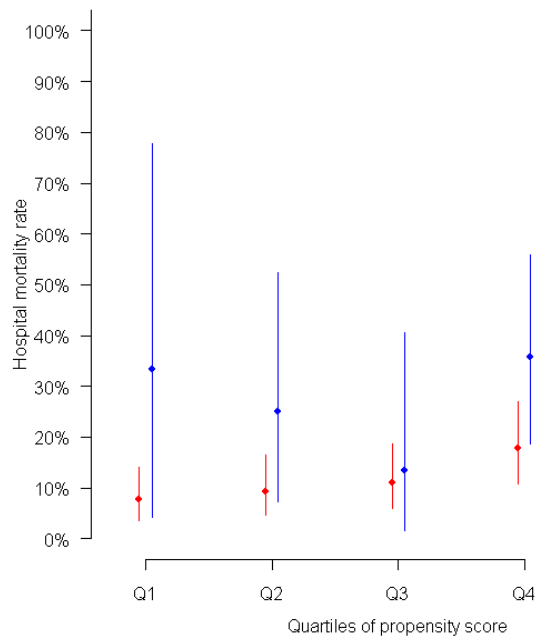

This figure demonstrates that the case-fatality rate is generally higher for patients with bacteremia in each propensity score quartile. This difference is smaller in quartile 3 than in the other quartiles.

2. Estimate the effect of VAP/VAP + Bacteremia in logistic regression model adjusting for the propensity score in quartiles.

Deviance Residuals:

| Min     | 1Q      | Median  | 3Q      | Max    |
|---------|---------|---------|---------|--------|
| -0.9426 | -0.6271 | -0.4545 | -0.4194 | 2.2246 |

Coefficients:

|               | Estimate | Std. Error | z value | Pr(> z ) |     |
|---------------|----------|------------|---------|----------|-----|
| (Intercept)   | -2.3866  | 0.3185     | -7.494  | 6.68e-14 | *** |
| VAPTYPEBACVAP | 0.9456   | 0.3261     | 2.899   | 0.00374  | **  |
| psgpM2Q2      | 0.1683   | 0.4293     | 0.392   | 0.69496  |     |
| psgpM2Q3      | 0.1782   | 0.4288     | 0.416   | 0.67764  |     |
| psgpM2Q4      | 0.8600   | 0.3935     | 2.185   | 0.02887  | *   |

---

Signif. codes: 0 '\*\*\*' 0.001 '\*\*' 0.01 '\*' 0.05 '.' 0.1 ' ' 1

(Dispersion parameter for binomial family taken to be 1)

Null deviance: 387.89 on 491 degrees of freedom  
Residual deviance: 370.21 on 487 degrees of freedom  
AIC: 380.21

Number of Fisher Scoring iterations: 5

Bacteremia is associated with a 2.57 increased odds of death (95% confidence interval: 1.36 - 4.88) after adjustment for propensity quartile.
